# Supplementary material
Source: publisher site journal article supplement (https://www.dovepress.com/article/383680)

Absolute standardized difference  
(maximum pairwise)

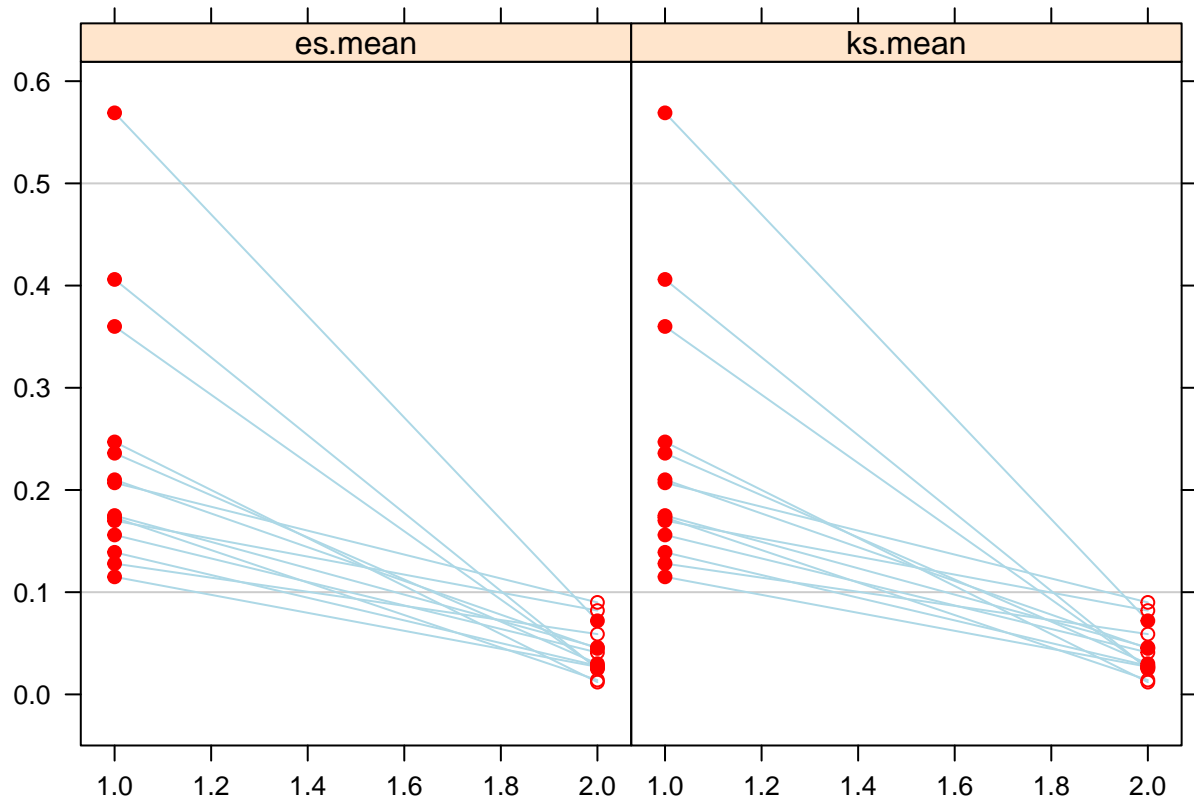

Supplement: Supplementary file 1 [file Figure S1.pdf › Figure S1.pdf]
